# Supplementary material for: Production of cinnamic and p-hydroxycinnamic acid from sugar mixtures with engineered Escherichia coli
Source: PubMed Central journal article supplement (PMC4305220; doi:10.1186/s12934-014-0185-1), 2015-01-16
Supplement: 12934_2014_185_MOESM2_ESM.pdf [file 12934_2014_185_MOESM2_ESM.pdf]

**Table S1.** Kinetic parameters of growth strains in minimal medium with glucose 55.5 mM (10 g/L).

| Strain | $\mu$<br>(h <sup>-1</sup> ) | $q_{\text{Glc}}$<br>(mmolC/<br>g <sub>DCW</sub> h) | pHCA<br>( $\mu\text{M}$ ) | $Y_{\text{pHCA/Glc}}$<br>( $\mu\text{mol}_{\text{pHCA}}/\text{mmolC}$ ) | $q_{\text{pHCA}}$<br>( $\mu\text{mol}_{\text{pHCA}}/\text{g}_{\text{DCW}} \text{ h}$ ) | CA<br>( $\mu\text{M}$ ) | $Y_{\text{CA/Glc}}$<br>( $\mu\text{mol}_{\text{CA}}/\text{mmolC}$ ) | $q_{\text{CA}}$<br>( $\mu\text{mol}_{\text{CA}}/\text{g}_{\text{DCW}} \text{ h}$ ) | Acetic<br>Acid<br>(mM) |
|--------|-----------------------------|----------------------------------------------------|---------------------------|-------------------------------------------------------------------------|----------------------------------------------------------------------------------------|-------------------------|---------------------------------------------------------------------|------------------------------------------------------------------------------------|------------------------|
| WPJRg  | 0.39 ±                      | 62.04 ±                                            | 5.2 ±                     | 0.05 ±                                                                  | 2.48 ±                                                                                 | 13.2 ±                  | 0.07 ±                                                              | 4.40 ±                                                                             | 35.9 ± 11              |
|        | 0.05                        | 27.46                                              | 0.65                      | 0.02                                                                    | 0.88                                                                                   | 3.39                    | 0.03                                                                | 1.13                                                                               |                        |
| WPJAt  | 0.28 ±                      | 35.14 ±                                            | ---                       | ---                                                                     | ---                                                                                    | 527.68 ±                | 4.75 ±                                                              | 197.09 ±                                                                           | 25.77 ±                |
|        | 0.01                        | 2.89                                               |                           |                                                                         |                                                                                        | 24.63                   | 0.17                                                                | 11.74                                                                              | 12.42                  |
| VPJRg  | 0.15 ±                      | 15.29 ±                                            | 107.21 ±                  | 1.03 ±                                                                  | 27.62 ±                                                                                | 248.34 ±                | 1.08 ±                                                              | 47.5 ±                                                                             | 11.9 ±                 |
|        | 0.03                        | 4.44                                               | 14.43                     | 0.56                                                                    | 7.23                                                                                   | 56.25                   | 0.15                                                                | 2.6                                                                                | 2.70                   |
| VPJAt  | 0.05 ±                      | 11.10 ±                                            | ---                       | ---                                                                     | ---                                                                                    | 529.94 ±                | 17.01 ±                                                             | 288.3 ±                                                                            | ---                    |
|        | 0.01                        | 1.94                                               |                           |                                                                         |                                                                                        | 33.25                   | 2.70                                                                | 47.9                                                                               |                        |

**Table S2.** Kinetic parameters of growth strains in minimal medium with xylose 66.6 mM (10 g/L).

| Strain | $\mu$<br>(h <sup>-1</sup> ) | $q_{Xyl}$<br>(mmolC/<br>g <sub>DCW</sub> h) | pHCA<br>( $\mu$ M) | $Y_{pHCA/Xyl}$<br>( $\mu$ mol <sub>pHCA</sub> /<br>mmolC) | $q_{pHCA}$<br>( $\mu$ mol <sub>pHCA</sub> /<br>g <sub>DCW</sub> h) | CA<br>( $\mu$ M) | $Y_{CA/Xyl}$<br>( $\mu$ mol <sub>CA</sub> /<br>mmolC) | $q_{CA}$<br>( $\mu$ mol <sub>CA</sub> /g<br>DCW h) | Acetic<br>Acid<br>(mM) |
|--------|-----------------------------|---------------------------------------------|--------------------|-----------------------------------------------------------|--------------------------------------------------------------------|------------------|-------------------------------------------------------|----------------------------------------------------|------------------------|
| WPJRg  | 0.41 ± 0.02                 | 78.43 ± 14.38                               | 25.4 ± 7.56        | 0.23 ± 0.12                                               | 16.02 ± 7.48                                                       | 48.81 ± 5.53     | 0.42 ± 0.03                                           | 24.50 ± 2.27                                       | 21.87 ± 5.37           |
|        | 0.28 ± 0.02                 | 28.10 ± 2.33                                | ---                |                                                           | ---                                                                | 736.85 ± 52.11   | 6.03 ± 1.26                                           | 165.61 ± 3.86                                      | 11.01 ± 3.96           |
| VPJRg  | 0.40 ± 0.02                 | 59.13 ± 7.67                                | 15.5 ± 12.24       | 0.14 ± 0.04                                               | 8.37 ± 3.50                                                        | 24.35 ± 4.01     | 0.21 ± 0.05                                           | 12.18 ± 1.71                                       | 28.29 ± 7.83           |
|        | 0.24 ± 0.01                 | 25.53 ± 3.13                                | ---                |                                                           | ---                                                                | 315.98 ± 62.97   | 3.57 ± 0.61                                           | 139.0 ± 17.4                                       | 10.81 ± 5.73           |

**Table S3.** Kinetic parameters of growth strains in minimal medium with arabinose 66.6 mM (10 g/L).

| Strain | $\mu$<br>(h <sup>-1</sup> ) | $q_{Ara}$<br>(mmolC/<br>g <sub>DCW</sub> h) | pHCA<br>( $\mu$ M) | $Y_{pHCA/Ara}$<br>( $\mu$ mol <sub>pHCA</sub> /<br>mmolC) | $q_{pHCA}$<br>( $\mu$ mol <sub>pHCA</sub> /<br>g <sub>DCW</sub> h) | CA<br>( $\mu$ M) | $Y_{CA/Ara}$<br>( $\mu$ mol <sub>CA</sub> /<br>mmolC) | $q_{CA}$<br>( $\mu$ mol <sub>CA</sub> /g<br>DCW h) | Acetic<br>Acid<br>(mM) |
|--------|-----------------------------|---------------------------------------------|--------------------|-----------------------------------------------------------|--------------------------------------------------------------------|------------------|-------------------------------------------------------|----------------------------------------------------|------------------------|
| WPJRg  | 0.42 ±                      | 65.85 ±                                     | 76.75 ±            | 0.437 ±                                                   | 14.39 ±                                                            | 100.21 ±         | 0.5 ±                                                 | 29.08 ±                                            | 3.55 ± 0               |
|        | 0.02                        | 9.48                                        | 20.16              | 0.11                                                      | 2.84                                                               | 15.72            | 0.08                                                  | 3.82                                               |                        |
| WPJAt  | 0.23 ±                      | 38.33 ±                                     | ---                | ---                                                       | ---                                                                | 1022.36 ±        | 7.91 ±                                                | 368.91 ±                                           | 5.48 ±                 |
|        | 0.003                       | 1.58                                        |                    |                                                           |                                                                    | 56.8             | 1.62                                                  | 45.74                                              | 1.4                    |
| VPJRg  | 0.39 ±                      | 65.33 ±                                     | 27.01 ±            | 0.20 ±                                                    | 7.18 ±                                                             | 40.08 ±          | 0.29 ±                                                | 18.08 ±                                            | 19.75 ±                |
|        | 0.06                        | 23.59                                       | 5.2                | 0.06                                                      | 3.45                                                               | 5.89             | 0.06                                                  | 4.40                                               | 5.01                   |
| VPJAt  | 0.08 ±                      | 26.95 ±                                     | ---                | ---                                                       | ---                                                                | 329.31 ±         | 15.67 ±                                               | 282.58±                                            | 20.38 ±                |
|        | 0.01                        | 5.0                                         |                    |                                                           |                                                                    | 23.28            | 8.06                                                  | 82.53                                              | 3.02                   |

**Table S4.** Kinetic parameters of cultures with engineered strains grown in a minimal medium with simulated hydrolysate (SH). Glucose 6.66 mM (1.2 g/L), xylose 53.3 mM (8 g/L), arabinose 5.33 mM (0.8 g/L) and acetate 6.09 mM (0.5 g/L). Total sugars 62.29 mM (10 g/L)

| Strain                          | $\mu$<br>(h <sup>-1</sup> ) | $q_{SH}$<br>(mmolC/<br>g <sub>DCW</sub> h) | pHCA<br>( $\mu$ M) | $Y_{pHCA/SH}$<br>( $\mu$ mol <sub>pHCA</sub> /<br>mmolC) | $q_{pHCA}$<br>( $\mu$ mol <sub>pHCA</sub> /<br>g <sub>DCW</sub> h) | CA<br>( $\mu$ M)  | $Y_{CA/SH}$<br>( $\mu$ mol <sub>CA</sub> /<br>mmolC) | $q_{CA}$<br>( $\mu$ mol <sub>CA</sub> /g<br>DCW h) | Acetic<br>Acid<br>(mM) |
|---------------------------------|-----------------------------|--------------------------------------------|--------------------|----------------------------------------------------------|--------------------------------------------------------------------|-------------------|------------------------------------------------------|----------------------------------------------------|------------------------|
| WPJRg                           | 0.41 ±<br>0.05              | 64.46 ±<br>16.54                           | 39.16 ±<br>1.65    | 0.29 ±<br>0.06                                           | 18.17 ±<br>2.53                                                    | 43.06 ±<br>7.13   | 0.31 ±<br>0.08                                       | 19.81 ±<br>5.20                                    | 38.48 ±<br>7.7         |
| WPJAt                           | 0.18 ±<br>0.06              | 30.50 ±<br>15.80                           | ---                | ---                                                      | ---                                                                | 398.36 ±<br>74.16 | 4.73 ±<br>1.54                                       | 137.32 ±<br>8.2                                    | 21.51 ±<br>4.67        |
| VPJRg                           | 0.40 ±<br>0.03              | 59.79 ±<br>10.84                           | 26.44 ±<br>9.4     | 0.20 ±<br>0.06                                           | 12.10 ±<br>4.20                                                    | 44.27 ±<br>6.9    | 0.41 ±<br>0.09                                       | 24.03 ±<br>0.86                                    | 45.07 ±<br>9.95        |
| VPJAt                           | 0.17 ±<br>0.03              | 29.63 ±<br>6.59                            | ---                | ---                                                      | ---                                                                | 260.49 ±<br>8.11  | 4.39 ±<br>2.00                                       | 180.52 ±<br>37.92                                  | 21.79 ±<br>4.7         |
| W( <i>pheA</i> <sup>-</sup> )Rg | 0.14 ±<br>0.01              | 22.18 ±<br>3.51                            | 322.9 ±<br>18.32   | 2.37 ±<br>0.13                                           | 52.57 ±<br>6.84                                                    | 111.52 ±<br>7.9   | 0.460 ±<br>0.02                                      | 22.87 ±<br>1.61                                    | 25.18 ±<br>3.98        |
| W( <i>pheA</i> <sup>-</sup> )At | 0.024 ±<br>0.003            | 14.17 ±<br>1.70                            | ---                | ---                                                      | ---                                                                | 338.65 ±<br>33.08 | 3.65 ±<br>0.16                                       | 69.62 ±<br>7.43                                    | 13.99 ±<br>0.51        |
